# Supplementary material
Source: Springer Nature journal article supplement (https://www.springermedizin.de/resource/supplementary/12911_2010_405_MOESM3_ESM.pdf/9525672)

# 'Social' time

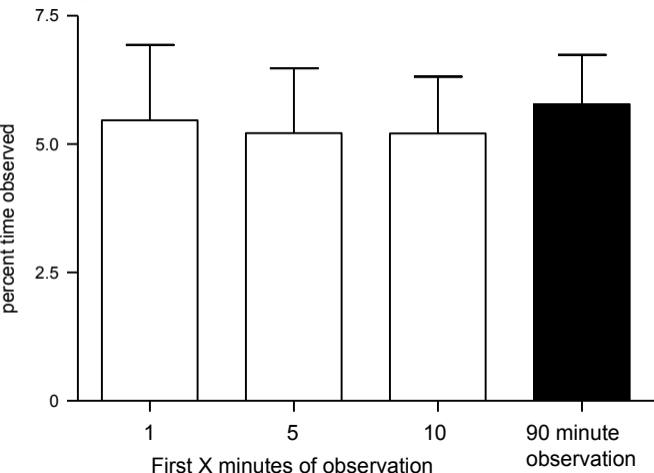

Supplement: MOESM3 [file 9525672]
